# Supplementary material
Source: publisher figshare collection journal article supplement (https://gsajournals.figshare.com/ndownloader/files/16628171)
Supplement: Supplementary file 1 [file 16628171]

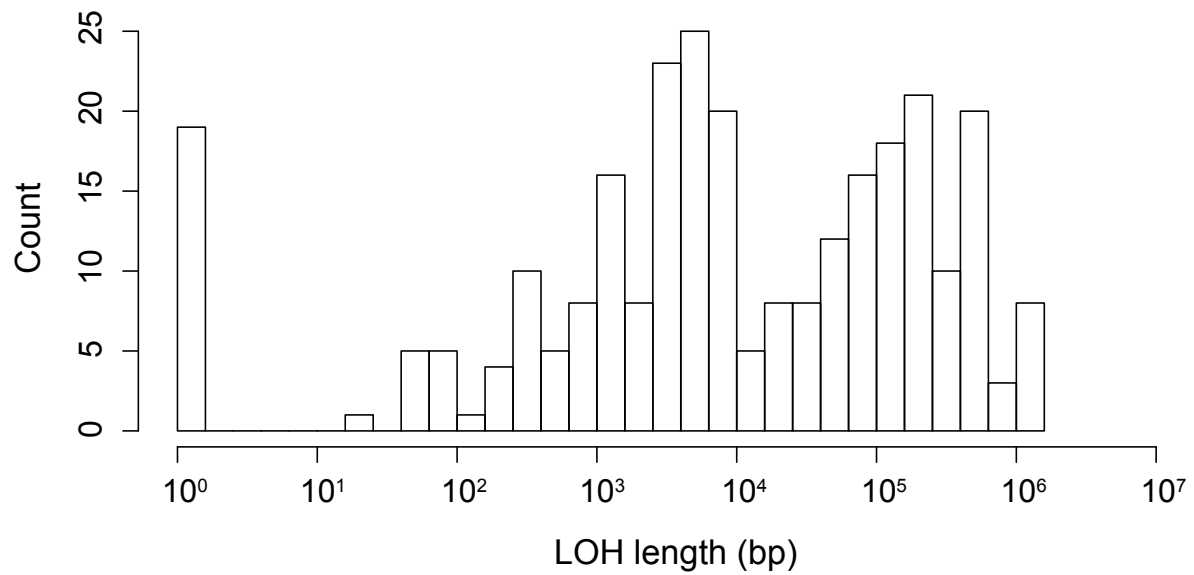

**Suppl. Figure 2.** Distribution of LOH lengths (279 observations). The values are minimum estimates of length calculated as the distance in bp between the furthest apart homozygous nucleotides of the LOH event. Values of 1 bp could reflect recombination events as large as thousands of bp or as few as several or single bases, depending on the levels of heterozygosity in the flanking regions.
